# Supplementary material for: Effects of Dehydration and Rehydration on Cognitive Performance and Mood among Male College Students in Cangzhou, China: A Self-Controlled Trial
Source: PubMed Central journal article supplement (PMC6603652; doi:10.3390/ijerph16111891), 2019-05-29
Supplement: ijerph-16-01891-s001.pdf [file ijerph-16-01891-s001.pdf]

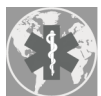

Supplementary Material

# Effects of Dehydration and Rehydration on Cognitive Performance and Mood among Male College Students in Cangzhou, China: A Self-Controlled Trial

Na Zhang, Song M Du, Jian F Zhang and Guan S Ma \*

**Table S1.** Total fluid from food, 24 h urine volume, void number of subjects on day 3.

| Subjects ID                | Total Fluid from Food (ml) | 24 h Urine Volume (ml) | Void Number |
|----------------------------|----------------------------|------------------------|-------------|
| 1                          | 1029.2                     | 999.3                  | 7           |
| 2                          | 1051.4                     | 746.3                  | 6           |
| 3                          | 911.7                      | 832.3                  | 3           |
| 4                          | 958.6                      | 744.5                  | 3           |
| 5                          | 1042.8                     | 722.3                  | 6           |
| 6                          | 1130.4                     | 1031.0                 | 6           |
| 7                          | 610.9                      | 551.9                  | 3           |
| 8                          | 962.2                      | 940.7                  | 4           |
| 9                          | 751.6                      | 668.0                  | 3           |
| 10                         | 1043.6                     | 882.5                  | 5           |
| 11                         | 936.0                      | 661.5                  | 2           |
| 12                         | 839.2                      | 811.0                  | 7           |
| Average±Standard Deviation | 939.0 ± 145.7              | 799.3 ± 144.9          | 5 ± 2       |

**Table S2.** The osmolality and volume for each spot urine among subjects on day 3 (urine osmolality(mOsm/kg) /urine volume(mL)).

| Subjects ID | The 1st Spot Urine | The 2nd Spot Urine | The 3rd Spot Urine | The 4th Spot Urine | The 5th Spot Urine | The 6th Spot Urine | The 7th Spot Urine |
|-------------|--------------------|--------------------|--------------------|--------------------|--------------------|--------------------|--------------------|
| 1           | 890/257.0          | 917/36.6           | 1001/71.2          | 1005/188.5         | 1003/107.0         | 985/132.0          | 1045/207.0         |
| 2           | 1012/229.8         | 1089/125.8         | 951/34.3           | 1082/137.5         | 825/61.9           | 1115/157.0         | -/-                |
| 3           | 858/275.8          | 1191/187.2         | 1207/369.3         | -/-                | -/-                | -/-                | -/-                |
| 4           | 1147/519           | 1200/147.1         | 1205/78.4          | -/-                | -/-                | -/-                | -/-                |
| 5           | 1031/165.8         | 1095/107.8         | 775/117.4          | 1141/146.2         | 1164/118.9         | 1178/66.2          | -/-                |
| 6           | 534/275.6          | 408/226.1          | 839/216.6          | 977/138.7          | 974/107.0          | 1049/67.0          | -/-                |
| 7           | 974/274.4          | 1075/110.5         | 1192/167           | -/-                | -/-                | -/-                | -/-                |
| 8           | 1109/366.5         | 1171/199.5         | 1143/202.8         | 1120/171.9         | -/-                | -/-                | -/-                |
| 9           | 584/216.5          | 820/278.7          | 1052/172.8         | -/-                | -/-                | -/-                | -/-                |
| 10          | 879/234.1          | 953/116.4          | 1129/93.0          | 975/232.0          | 1168/207.0         | -/-                | -/-                |

|    |           |            |           |          |           |           |            |
|----|-----------|------------|-----------|----------|-----------|-----------|------------|
| 11 | 950/314.5 | 1039/347.0 | -/-       | -/-      | -/-       | -/-       | -/-        |
| 12 | 968/211.0 | 993/59.9   | 950/113.9 | 950/93.7 | 1002/77.2 | 1022/97.9 | 1110/157.4 |

Note: Data were shown as urine osmolality (mOsm/kg) /urine volume(mL).

**Table S3.** Hydration state of subjects on day 3 (void number/percentage).

| Subjects ID | Dehydration State | Optimal Hydration State | Middle Hydration State |
|-------------|-------------------|-------------------------|------------------------|
| 1           | 7/100%            | 0/0%                    | 0/0%                   |
| 2           | 6/100%            | 0/0%                    | 0/0%                   |
| 3           | 3/100%            | 0/0%                    | 0/0%                   |
| 4           | 3/100%            | 0/0%                    | 0/0%                   |
| 5           | 5/83.3%           | 0/0%                    | 1/16.7%                |
| 6           | 4/66.7%           | 1/16.7%                 | 1/16.7%                |
| 7           | 3/100%            | 0/0%                    | 0/0%                   |
| 8           | 4/100%            | 0/0%                    | 0/0%                   |
| 9           | 2/66.7%           | 0/0%                    | 1/33.3%                |
| 10          | 5/100%            | 0/0%                    | 0/0%                   |
| 11          | 2/100%            | 0/0%                    | 0/0%                   |
| 12          | 7/100%            | 0/0%                    | 0/0%                   |

Note: Data were shown as void number/percentage (%).

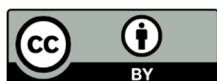

© 2019 by the authors. Submitted for possible open access publication under the terms and conditions of the Creative Commons Attribution (CC BY) license (<http://creativecommons.org/licenses/by/4.0/>).
